# Supplementary material
Source: PubMed Central journal article supplement (PMC4260351)
Supplement: cr2014153x2.pdf [file cr2014153x2.pdf]

**Supplementary information, Table S1** Data collection, and refinement statistics

|                                                         | Se YTH-YTHDF2                      | YTH-YTHDF2              | YTH-YTHDF2:m <sup>6</sup> A |
|---------------------------------------------------------|------------------------------------|-------------------------|-----------------------------|
| Wavelength(Å)                                           | 0.979                              | 0.979                   | 0.979                       |
| Space group                                             | <i>P</i> 6 <sub>5</sub>            | <i>P</i> 6 <sub>5</sub> | <i>P</i> 6 <sub>5</sub>     |
| Cell parameters                                         |                                    |                         |                             |
| a, b, c (Å)                                             | 139.28 139.28 113.22               | 139.28 139.28 112.95    | 80.73 80.73 113.48          |
| $\alpha$ , $\beta$ , $\gamma$ (°)                       | 90, 90, 120                        | 90, 90, 120             | 90, 90, 120                 |
| Resolution(Å)                                           | 37.89-2.20(2.32-2.20) <sup>a</sup> | 43.86-2.15(2.27-2.15)   | 38.03-2.10(2.21-2.10)       |
| <i>R</i> <sub>merge</sub> (%)                           | 12.1(68.8)                         | 10.0(54.2)              | 12.2(53.5)                  |
| I/ $\sigma$ I                                           | 9.3(2.9)                           | 10.3(3.0)               | 12.0(3.7)                   |
| Completeness (%)                                        | 90.8(92.9)                         | 97.0(98.4)              | 100.0(100.0)                |
| Average redundancy                                      | 5.1(5.0)                           | 4.5(4.5)                | 8.2(8.4)                    |
| <b>Refinement(F&gt;0)</b>                               |                                    |                         |                             |
| No. reflections (overall)                               |                                    | 62258                   | 23209                       |
| No. reflections (test set)                              |                                    | 3329                    | 1247                        |
| <i>R</i> <sub>work</sub> / <i>R</i> <sub>free</sub> (%) |                                    | 21.27/27.02             | 21.71/26.91                 |
| No. non-H atoms                                         |                                    |                         |                             |
| Protein                                                 |                                    | 7090                    | 2465                        |
| m <sup>6</sup> A nucleotide                             |                                    |                         | 40                          |
| Water                                                   |                                    | 422                     | 234                         |
| B factors (Å <sup>2</sup> )                             |                                    |                         |                             |
| Protein                                                 |                                    | 33.9                    | 27.6                        |
| m <sup>6</sup> A nucleotide                             |                                    |                         | 21.4                        |
| Water                                                   |                                    | 35.0                    | 32.4                        |
| R.m.s. deviations                                       |                                    |                         |                             |
| Bond lengths (Å)                                        |                                    | 0.0087                  | 0.0061                      |
| Bond angles (°)                                         |                                    | 1.2557                  | 1.1220                      |
| Rampage plot % residues                                 |                                    |                         |                             |
| Favored                                                 |                                    | 97.3                    | 97.3                        |
| Allowed                                                 |                                    | 2.7                     | 2.7                         |
| Outliers                                                |                                    | 0                       | 0                           |

<sup>a</sup> Values in parentheses are for highest-resolution shell.
